# Supplementary material for: Transcriptome-Wide Analysis of Human Liver Reveals Age-Related Differences in the Expression of Select Functional Gene Clusters and Evidence for a PPP1R10-Governed ‘Aging Cascade’
Source: MDPI journal article supplement (doi:10.3390/pharmaceutics13122009), 2021-11-25
Supplement: s1 [file s1]

# Supplementary Materials: Transcriptome-Wide Analysis of Human Liver Reveals Age-Related Differences in the Expression of Select Functional Gene Clusters and Evidence for a *PPP1R10*-Governed ‘Aging Cascade’

Thomas Schreiter, Robert K. Gieseler, Ramiro Vélchez-Vargas, Ruy Jauregui, Jan-Peter Sowa, Susanne Klein-Scory, Ruth Broering, Roland S. Croner, Jürgen W. Treckmann, Alexander Link and Ali Canbay

**Table S1.** Demographic and clinical characteristics of patient groups I and II in order of gender and increasing age. Prior to surgery, all patients tested negative for the hepatitis viruses HAV, HBV, HCV, and HDV as well as HIV-1. All patients underwent surgery before the onset of the COVID-19 pandemic and, thus, were not tested for SARS-CoV-2. None of the patients had received radiotherapy. (Abbreviations: AHT, arterial hypertension; BEP, bleomycin + etoposide + cisplatin; CA, carcinoma; CCA, cholangiocellular carcinoma; CP/PT, carboplatin + paclitaxel; f, female; FOLFOX, folinic acid + fluorouracil + oxaliplatin; FNH, focal nodular hyperplasia; HCC, hepatocellular carcinoma; HCA, hepatocellular adenoma; HHEx, hemihepatectomy; m, male; mets, metastases; NASH, non-alcoholic steatohepatitis; pre-OP, preoperatively; RES, resection; SEG, segment or segment; T1DM or T2DM, type 1 or type 2 diabetes mellitus; TC, testicular cancer.).

| Group I: Young          |     |                    |                                           |                           |          |                                         |      |                  |                                                                 |
|-------------------------|-----|--------------------|-------------------------------------------|---------------------------|----------|-----------------------------------------|------|------------------|-----------------------------------------------------------------|
| Demographic Information |     |                    |                                           | Medication                |          | Comorbidities or Additional Information |      |                  |                                                                 |
| Gender                  | Age | Underlying Disease | Surgical Intervention                     | Preoperative Chemotherapy | Diabetes | Steatosis (Grade)                       | NASH | Fibrosis (Grade) | Other                                                           |
| f                       | 23  | HCA                | Right HHEx                                | –                         | –        | –                                       | –    | –                | Bronchial asthma                                                |
| f                       | 26  | FNH                | Right HHEx + Atypical RES: SEG I, II, III | –                         | –        | –                                       | –    | –                | –                                                               |
| f                       | 26  | FNH                | RES: SEG II, III, VII                     | –                         | –        | 2                                       | Yes  | –                | –                                                               |
| f                       | 34  | FNH                | Typical RES: SEG IV                       | –                         | –        | –                                       | –    | –                | Obesity                                                         |
| f                       | 43  | Cervical CA: Mets  | Left HHEx                                 | CP/PT                     | T1DM     | –                                       | –    | –                | –                                                               |
| f                       | 47  | CCA                | Right HHEx                                | –                         | –        | –                                       | –    | –                | Substituted hypothyreosis after hemithyroidectomy 3 yrs. pre-OP |
| m                       | 25  | TC: Mets           | RES: SEG V, VI + atypical RES: SEG III    | BEP                       | –        | –                                       | –    | –                | –                                                               |
| m                       | 46  | HCA                | RES: SEG II, III                          | –                         | T2DM     | 2                                       | Yes  | –                | AHT                                                             |
| m                       | 48  | Colon CA: Mets     | RES: SEG II, III, IVa, VI, VIII           | FOLFOX                    | –        | –                                       | –    | –                | –                                                               |
| Group II: Old           |     |                    |                                           |                           |          |                                         |      |                  |                                                                 |
| Demographic Information |     |                    |                                           | Medication                |          | Comorbidities or Additional Information |      |                  |                                                                 |
| Gender                  | Age | Underlying Disease | Surgical Intervention                     | Preoperative Chemotherapy | Diabetes | Steatosis (Grade)                       | NASH | Fibrosis (Grade) | Other                                                           |

|   |    |                   |                                         |   |      |   |   |       |                                |
|---|----|-------------------|-----------------------------------------|---|------|---|---|-------|--------------------------------|
| f | 79 | Colon CA:<br>Mets | Right HHEx                              | – | –    | – | – | –     | Multinodular goiter            |
| f | 79 | CCA               | Right HHEx                              | – | –    | 2 | – | F1    | AHT                            |
| m | 75 | HCC               | RES: SEG VI                             | – | –    | 1 | – | F4    | AHT                            |
| m | 76 | Colon CA:<br>Mets | Right HHEx +<br>atypical RES:<br>SEG II | – | T2DM | – | – | –     | AHT                            |
| m | 76 | Sigma CA:<br>Mets | RES: SEG VIb,<br>V                      | – | –    | – | – | F0–F1 | AHT                            |
| m | 78 | Colon CA:<br>Mets | Right HHEx                              | – | –    | 2 | – | F2    | AHT                            |
| m | 78 | CCA               | RES: SEG II, III                        | – | –    | – | – | F1    | AHT, obesity                   |
| m | 78 | CCA               | Extended right<br>HHEx                  | – | –    | – | – | –     | In-situ split 2 wks.<br>pre-OP |

**Table S2.** Human target transcripts for qRT-PCR. The list starts with the reference gene, followed by genes of the transcripts investigated in alphabetical order.

| Genes <sup>1</sup>      | Sequences       | Genes <sup>1</sup> | Sequences       |
|-------------------------|-----------------|--------------------|-----------------|
| <i>PPIA</i> (reference) |                 |                    |                 |
| Main target             | ENST00000468812 |                    |                 |
| Amplicon length         | 114             |                    |                 |
| Number of targets       | 4               |                    |                 |
|                         |                 |                    |                 |
| <i>CFLAR</i>            |                 | <i>HSD17B14</i>    |                 |
| Main target             | ENST00000309955 | Main target        | ENST00000596349 |
| Amplicon length         | 109             | Amplicon length    | 86              |
| Number of targets       | 7               | Number of targets  | 4               |
| <i>DUSP1</i>            |                 | <i>IGFALS</i>      |                 |
| Main target             | ENST00000239223 | Main target        | ENST00000415638 |
| Amplicon length         | 116             | Amplicon length    | 67              |
| Number of targets       | 1               | Number of targets  | 1               |
| <i>EGR1</i>             |                 | <i>KIAA0040</i>    |                 |
| Main target             | ENST00000239938 | Main target        | ENST00000563563 |
| Amplicon length         | 127             | Amplicon length    | 131             |
| Number of targets       | 1               | Number of targets  | 6               |
| <i>FAH</i>              |                 | <i>LIPC</i>        |                 |
| Main target             | ENST00000537726 | Main target        | ENST00000560664 |
| Amplicon length         | 117             | Amplicon length    | 84              |
| Number of targets       | 10              | Number of targets  | 6               |
| <i>FLNA</i>             |                 | <i>PPP1R10</i>     |                 |
| Main target             | ENST00000420627 | Main target        | ENST00000376511 |
| Amplicon length         | 141             | Amplicon length    | 103             |
| Number of targets       | 7               | Number of targets  | 2               |
| <i>GATA4</i>            |                 | <i>TFF3</i>        |                 |
| Main target             | ENST00000526716 | Main target        | ENST00000398431 |
| Amplicon length         | 81              | Amplicon length    | 68              |
| Number of targets       | 1               | Number of targets  | 4               |

<sup>1</sup> *CFLAR*, CASP8- and FADD-like apoptosis regulator; *DUSP1*, dual specificity phosphatase 1; *EGR1*, early growth response 1; *FAH*, fumarylacetoacetate hydrolase; *FLNA*, filamin A; *GATA4*, GATA-binding protein 4; *HSD17B14*, hydroxysteroid 17- $\beta$  dehydrogenase 14; *IGFALS*, insulin-like growth factor-binding protein acid labile subunit; *KIAA0040*, uncharacterized protein KIAA0040; *LIPC*, lipase C, hepatic type; *PPP1R10*, protein phosphatase 1 regulatory subunit 10; *PPIA*, peptidyl-prolyl *cis-trans* isomerase A; *TFF3*, trefoil factor 3.

**Table S3.** Gene expressions of interest identified by applying EFS software. Transcripts are listed from most relevant to least relevant according to their EFS scores (>0.3: 16 transcripts / >0.2: 28 further transcripts). For full names of protein products, cf. Table 2. Increases in EFS scores indicate increasing relevance when comparing young and old patients. Ratios between Group (Grp.) I and Group II differing by a factor of at least  $\times 2$  (i.e.,  $\leq 0.5$  or  $\geq 2.0$ ) are boxed (red data in Figure 2), while ratios between >0.5 and <2.0 are underlined (blue data in Figure 2). Data for all 44 transcripts are at least statistically significant ( $p < 0.05$ ). (Abbreviations: Grp., Group; TPM, transcripts per million.).

| Gene ID         | Gene              | Transcription Rates [TPM] |        |         |                                        | $p$<br>(Two-tailed) |       | EFS Score |
|-----------------|-------------------|---------------------------|--------|---------|----------------------------------------|---------------------|-------|-----------|
|                 |                   | Maximum                   | Mean   | Mean    | Ratio                                  |                     |       |           |
|                 |                   |                           | Grp. I | Grp. II | $\frac{\text{Grp. II}}{\text{Grp. I}}$ |                     |       |           |
| ENSG00000204569 | <i>PPP1R10</i>    | 159.20                    | 107.86 | 67.79   | <u>0.629</u>                           | 0.0003              | > 0.3 | 0.61415   |
| ENSG00000120129 | <i>DUSP1</i>      | 557.40                    | 375.44 | 212.30  | <u>0.565</u>                           | 0.0055              |       | 0.55957   |
| ENSG00000087076 | <i>HSD17B14</i>   | 90.77                     | 47.32  | 12.74   | 0.269                                  | 0.0010              |       | 0.53103   |
| ENSG00000148120 | <i>AOPEP</i>      | 179.15                    | 114.07 | 66.16   | 0.580                                  | 0.0010              |       | 0.40353   |
| ENSG00000185745 | <i>IFIT1</i>      | 70.04                     | 23.61  | 41.94   | <u>1.776</u>                           | 0.0360              |       | 0.36984   |
| ENSG00000235750 | <i>KIAA0040</i>   | 61.92                     | 27.85  | 14.67   | <u>0.527</u>                           | 0.0016              |       | 0.36721   |
| ENSG00000196924 | <i>FLNA</i>       | 92.67                     | 56.39  | 33.07   | 0.586                                  | 0.0016              |       | 0.35981   |
| ENSG00000003402 | <i>CFLAR</i>      | 123.14                    | 93.58  | 65.16   | <u>0.696</u>                           | 0.0006              |       | 0.33686   |
| ENSG00000085563 | <i>ABCB1</i>      | 54.81                     | 29.32  | 42.30   | <u>1.442</u>                           | 0.0206              |       | 0.33654   |
| ENSG00000103876 | <i>FAH</i>        | 301.97                    | 166.06 | 250.17  | 1.506                                  | 0.0111              |       | 0.32981   |
| ENSG00000153250 | <i>RBMS1</i>      | 52.92                     | 38.16  | 25.51   | <u>0.668</u>                           | 0.0152              |       | 0.32777   |
| ENSG00000099769 | <i>IGFALS</i>     | 471.76                    | 261.59 | 126.81  | <u>0.485</u>                           | 0.0037              |       | 0.32758   |
| ENSG00000117616 | <i>RSRP1</i>      | 162.29                    | 108.48 | 73.63   | 0.679                                  | 0.0274              |       | 0.32683   |
| ENSG00000089127 | <i>AC004551.1</i> | 58.72                     | 21.41  | 32.94   | 1.538                                  | 0.0206              |       | 0.32390   |
| ENSG00000144642 | <i>RBMS3</i>      | 85.14                     | 44.54  | 29.68   | <u>0.666</u>                           | 0.0055              |       | 0.31905   |
| ENSG00000160180 | <i>TFF3</i>       | 397.12                    | 81.92  | 1.25    | <u>0.015</u>                           | 0.0055              |       | 0.31574   |
| ENSG00000126012 | <i>KDM5C</i>      | 51.25                     | 30.87  | 19.87   | 0.643                                  | 0.0111              | > 0.2 | 0.28884   |
| ENSG00000152818 | <i>UTRN</i>       | 207.84                    | 125.80 | 70.80   | 0.563                                  | 0.0010              |       | 0.28580   |
| ENSG00000101335 | <i>MYL9</i>       | 64.72                     | 41.33  | 22.73   | 0.550                                  | 0.0079              |       | 0.26749   |
| ENSG00000183963 | <i>SMTN</i>       | 65.16                     | 36.07  | 21.85   | 0.606                                  | 0.0152              |       | 0.26602   |
| ENSG00000143248 | <i>RGS5</i>       | 337.12                    | 131.96 | 60.40   | <u>0.458</u>                           | 0.0152              |       | 0.25855   |
| ENSG00000074276 | <i>CDHR2</i>      | 73.29                     | 20.56  | 47.55   | 2.313                                  | 0.0111              |       | 0.25525   |
| ENSG00000100234 | <i>TIMP3</i>      | 276.12                    | 168.16 | 99.01   | <u>0.589</u>                           | 0.0206              |       | 0.25389   |
| ENSG00000166035 | <i>LIPC</i>       | 163.41                    | 85.65  | 124.67  | 1.456                                  | 0.0360              |       | 0.24764   |
| ENSG00000111077 | <i>TNS2</i>       | 118.89                    | 78.25  | 52.68   | 0.673                                  | 0.0206              |       | 0.24403   |
| ENSG00000105676 | <i>ARMC6</i>      | 113.94                    | 78.93  | 51.58   | 0.654                                  | 0.0464              |       | 0.23935   |
| ENSG00000075240 | <i>GRAMD4</i>     | 167.99                    | 62.66  | 21.86   | 0.349                                  | 0.0274              |       | 0.23830   |
| ENSG00000132254 | <i>ARFIP2</i>     | 60.99                     | 33.71  | 22.60   | 0.670                                  | 0.0206              |       | 0.23406   |
| ENSG00000184226 | <i>PCDH9</i>      | 104.44                    | 43.80  | 21.61   | 0.493                                  | 0.0274              |       | 0.23297   |
| ENSG00000099998 | <i>GGT5</i>       | 92.41                     | 42.52  | 27.77   | <u>0.653</u>                           | 0.0464              |       | 0.22929   |
| ENSG00000010322 | <i>NISCH</i>      | 61.59                     | 37.57  | 22.94   | 0.611                                  | 0.0206              |       | 0.22850   |
| ENSG00000120738 | <i>EGR1</i>       | 727.96                    | 381.72 | 174.46  | <u>0.457</u>                           | 0.0360              |       | 0.22582   |

|                 |                |          |          |          |              |        |         |
|-----------------|----------------|----------|----------|----------|--------------|--------|---------|
| ENSG00000149541 | <i>B3GAT3</i>  | 54.18    | 22.17    | 15.52    | 0.700        | 0.0464 | 0.22514 |
| ENSG00000136574 | <i>GATA4</i>   | 120.06   | 44.12    | 12.75    | <u>0.289</u> | 0.0274 | 0.22168 |
| ENSG00000154258 | <i>ABCA9</i>   | 64.27    | 37.59    | 24.27    | <u>0.646</u> | 0.0274 | 0.22112 |
| ENSG00000054282 | <i>SDCCAG8</i> | 66.80    | 45.26    | 31.39    | 0.693        | 0.0037 | 0.22020 |
| ENSG00000054654 | <i>SYNE2</i>   | 229.66   | 146.72   | 94.88    | 0.647        | 0.0274 | 0.21864 |
| ENSG00000257017 | <i>HP</i>      | 52678.43 | 16805.05 | 29002.98 | <u>1.726</u> | 0.0360 | 0.21811 |
| ENSG00000163660 | <i>CCNL1</i>   | 249.51   | 185.39   | 131.54   | <u>0.710</u> | 0.0274 | 0.21788 |
| ENSG00000058668 | <i>ATP2B4</i>  | 85.89    | 40.48    | 27.22    | 0.673        | 0.0464 | 0.21358 |
| ENSG00000107796 | <i>ACTA2</i>   | 82.20    | 51.34    | 21.13    | 0.411        | 0.0055 | 0.21218 |
| ENSG00000156234 | <i>CXCL13</i>  | 78.00    | 1.79     | 14.03    | <u>7.858</u> | 0.0360 | 0.20827 |
| ENSG00000117318 | <i>ID3</i>     | 113.79   | 74.94    | 45.82    | 0.611        | 0.0111 | 0.20143 |
| ENSG00000110719 | <i>TCIRG1</i>  | 88.64    | 57.28    | 39.21    | <u>0.684</u> | 0.0206 | 0.20042 |

---

**Table S4.** Specifications for gene transcripts identified by EFS software. Genes related to the 44 hepatic transcripts matching the EFS score cutoff of >0.2 are tabulated according to their chromosome (Chr) location, wherein listed alphabetically according their gene designations. Especially high ortholog/paralog<sup>1</sup> ratios (with ≤9 paralogs) are boxed. As summarized in the bottom section, gene transcripts of relevance were expressed from all human chromosomes, except for Chr 18 and Chr Y. Hence, no statistically significant age-dependent transcript differences were attributable to the male sex chromosome. Transcript numbers (##) with relevant age-dependent differences were six for Chr 1; four for Chr 22; three for Chr 3, 5, and 11; two for Chr 2, 6, 10, 12, 15, 16, 19, and X; and one for Chr 4, 7, 8, 9, 13, 14, 17, 20, and 21, respectively. Information was compiled from [https://www.ensembl.org/Homo\\_sapiens/Info/Index](https://www.ensembl.org/Homo_sapiens/Info/Index) (accessed on 2021-04-16).

| Gene ID         | Gene            | Full Name of Protein Product (Comments)                              | Location | Gene Information |         |                        |                       |
|-----------------|-----------------|----------------------------------------------------------------------|----------|------------------|---------|------------------------|-----------------------|
|                 |                 |                                                                      |          | Transcripts      | Alleles | Orthologs <sup>1</sup> | Paralogs <sup>1</sup> |
| ENSG00000058668 | <i>ATP2B4</i>   | ATPase plasma membrane Ca <sup>2+</sup> -transporting 4              | Chr 1    | 7                | 0       | 221                    | 22                    |
| ENSG00000117318 | <i>ID3</i>      | Inhibitor of DNA binding 3 (a so-called 'bHLH protein') <sup>2</sup> |          | 3                | 1       | 201                    | 3                     |
| ENSG00000235750 | <i>KIAA0040</i> | KIAA0040 (uncharacterized)                                           |          | 6                | 0       | 5                      | 0                     |
| ENSG00000143248 | <i>RGS5</i>     | Regulator of G protein signaling 5                                   |          | 12               | 0       | 202                    | 23                    |
| ENSG00000117616 | <i>RSRP1</i>    | Arginine- and serine-rich protein 1                                  |          | 22               | 0       | 114                    | 9                     |
| ENSG00000054282 | <i>SDCCAG8</i>  | SHH signaling and ciliogenesis regulator SDCCAG8                     |          | 11               | 1       | 90                     | 0                     |
| ENSG00000003402 | <i>CFLAR</i>    | CASP8- and FADD-like apoptosis regulator                             | Chr 2    | 25               | 0       | 222                    | 15                    |
| ENSG00000153250 | <i>RBMS1</i>    | RNA-binding motif single-stranded interacting protein 1              |          | 15               | 0       | 265                    | 24                    |
| ENSG00000163660 | <i>CCNL1</i>    | Cyclin L1                                                            | Chr 3    | 26               | 0       | 213                    | 6                     |
| ENSG00000010322 | <i>NISCH</i>    | Nischarin                                                            |          | 14               | 0       | 205                    | 1                     |
| ENSG00000144642 | <i>RBMS3</i>    | RNA-binding motif single-stranded interacting protein 3              |          | 20               | 0       | 261                    | 24                    |
| ENSG00000156234 | <i>CXCL13</i>   | C-X-C motif chemokine ligand 13                                      | Chr 4    | 2                | 0       | 111                    | 12                    |
| ENSG00000074276 | <i>CDHR2</i>    | Cadherin-related family member 2                                     | Chr 5    | 7                | 0       | 118                    | 34                    |
| ENSG00000120129 | <i>DUSP1</i>    | Dual specificity phosphatase 1                                       |          | 1                | 0       | 204                    | 30                    |
| ENSG00000120738 | <i>EGR1</i>     | Early growth response 1                                              |          | 1                | 0       | 225                    | 4                     |
| ENSG00000204569 | <i>PPP1R10</i>  | Protein phosphatase 1 regulatory subunit 10                          | Chr 6    | 7                | 1       | 197                    | 2                     |
| ENSG00000152818 | <i>UTRN</i>     | Utrophin                                                             |          | 13               | 0       | 261                    | 36                    |
| ENSG00000085563 | <i>ABCB1</i>    | ATP-binding cassette subfamily B member 1                            | Chr 7    | 11               | 0       | 159                    | 11                    |
| ENSG00000136574 | <i>GATA4</i>    | GATA-binding protein 4                                               | Chr 8    | 9                | 1       | 206                    | 7                     |
| ENSG00000148120 | <i>AOPEP</i>    | Aminopeptidase O (putative)                                          | Chr 9    | 21               | 0       | 224                    | 22                    |
| ENSG00000107796 | <i>ACTA2</i>    | Actin α <sub>2</sub> (smooth muscle)                                 | Chr 10   | 6                | 0       | 149                    | 27                    |
| ENSG00000185745 | <i>IFIT1</i>    | Interferon-induced protein with tetratricopeptide repeats 1          |          | 2                | 0       | 507                    | 4                     |
| ENSG00000149541 | <i>B3GAT3</i>   | β-1,3-Glucuronyltransferase 3                                        | Chr 11   | 6                | 0       | 194                    | 2                     |

|                 |               |                                                                                                                                                           |  |    |   |                |              |
|-----------------|---------------|-----------------------------------------------------------------------------------------------------------------------------------------------------------|--|----|---|----------------|--------------|
| ENSG00000132254 | <i>ARFIP2</i> | ADP ribosylation factor interacting protein 2                                                                                                             |  | 10 | 0 | <div>266</div> | <div>2</div> |
| ENSG00000110719 | <i>TCIRG1</i> | T-cell immune regulator 1, ATPase H <sup>+</sup> -transporting V0 subunit a <sub>3</sub><br>(a.k.a. V-type proton ATPase 116 kDa subunit a <sub>3</sub> ) |  | 16 | 0 | <div>233</div> | <div>3</div> |

|                 |                   |                                   |        |    |   |                |              |
|-----------------|-------------------|-----------------------------------|--------|----|---|----------------|--------------|
| ENSG00000089127 | <i>AC004551.1</i> | 2'-5'-Oligoadenylate synthetase 1 | Chr 12 | 33 | 0 | <div>148</div> | <div>3</div> |
| ENSG00000111077 | <i>TNS2</i>       | Tensin 2                          |        | 20 | 0 | <div>115</div> | <div>1</div> |

|                 |              |                 |        |   |   |     |    |
|-----------------|--------------|-----------------|--------|---|---|-----|----|
| ENSG00000184226 | <i>PCDH9</i> | Protocadherin 9 | Chr 13 | 6 | 0 | 220 | 34 |
|-----------------|--------------|-----------------|--------|---|---|-----|----|

|                 |              |                                                       |        |    |   |     |    |
|-----------------|--------------|-------------------------------------------------------|--------|----|---|-----|----|
| ENSG00000054654 | <i>SYNE2</i> | Spectrin repeat-containing nuclear envelope protein 2 | Chr 14 | 31 | 0 | 308 | 36 |
|-----------------|--------------|-------------------------------------------------------|--------|----|---|-----|----|

|                 |             |                               |        |    |   |                |              |
|-----------------|-------------|-------------------------------|--------|----|---|----------------|--------------|
| ENSG00000103876 | <i>FAH</i>  | Fumarylacetoacetate hydrolase | Chr 15 | 14 | 0 | <div>204</div> | <div>3</div> |
| ENSG00000166035 | <i>LIPC</i> | Lipase C (hepatic type)       |        | 7  | 0 | <div>228</div> | <div>9</div> |

|                 |               |                                                                |        |    |   |     |    |
|-----------------|---------------|----------------------------------------------------------------|--------|----|---|-----|----|
| ENSG00000257017 | <i>HP</i>     | Haptoglobin                                                    | Chr 16 | 18 | 0 | 137 | 17 |
| ENSG00000099769 | <i>IGFALS</i> | Insulin-like growth factor-binding protein acid labile subunit |        | 3  | 0 | 187 | 22 |

|                 |              |                                           |        |   |   |     |    |
|-----------------|--------------|-------------------------------------------|--------|---|---|-----|----|
| ENSG00000154258 | <i>ABCA9</i> | ATP-binding cassette subfamily A member 9 | Chr 17 | 8 | 0 | 105 | 11 |
|-----------------|--------------|-------------------------------------------|--------|---|---|-----|----|

|   |   |   |        |   |   |   |   |
|---|---|---|--------|---|---|---|---|
| – | – | – | Chr 18 | – | – | – | – |
|---|---|---|--------|---|---|---|---|

|                 |                 |                                      |        |    |   |                |               |
|-----------------|-----------------|--------------------------------------|--------|----|---|----------------|---------------|
| ENSG00000105676 | <i>ARMC6</i>    | Armadillo repeat containing 6        | Chr 19 | 20 | 0 | <div>201</div> | <div>0</div>  |
| ENSG00000087076 | <i>HSD17B14</i> | Hydroxysteroid 17-β-dehydrogenase 14 |        | 4  | 0 | <div>162</div> | <div>26</div> |

|                 |             |                      |        |   |   |                |              |
|-----------------|-------------|----------------------|--------|---|---|----------------|--------------|
| ENSG00000101335 | <i>MYL9</i> | Myosin light chain 9 | Chr 20 | 2 | 0 | <div>229</div> | <div>7</div> |
|-----------------|-------------|----------------------|--------|---|---|----------------|--------------|

|                 |             |                  |        |   |   |   |   |
|-----------------|-------------|------------------|--------|---|---|---|---|
| ENSG00000160180 | <i>TFF3</i> | Trefoil factor 3 | Chr 21 | 3 | 0 | 0 | 0 |
|-----------------|-------------|------------------|--------|---|---|---|---|

|                 |               |                                   |        |    |   |                |              |
|-----------------|---------------|-----------------------------------|--------|----|---|----------------|--------------|
| ENSG00000099998 | <i>GGT5</i>   | γ-Glutamyltransferase 5           | Chr 22 | 6  | 0 | <div>342</div> | <div>7</div> |
| ENSG00000075240 | <i>GRAMD4</i> | GRAM domain containing 4          |        | 7  | 0 | <div>265</div> | <div>0</div> |
| ENSG00000183963 | <i>SMTN</i>   | Smoothelin                        |        | 24 | 0 | <div>125</div> | <div>0</div> |
| ENSG00000100234 | <i>TIMP3</i>  | TIMP metallopeptidase inhibitor 3 |        | 1  | 0 | <div>211</div> | <div>3</div> |

|                 |              |                       |       |    |   |     |    |
|-----------------|--------------|-----------------------|-------|----|---|-----|----|
| ENSG00000196924 | <i>FLNA</i>  | Filamin A             | Chr X | 21 | 0 | 198 | 36 |
| ENSG00000126012 | <i>KDM5C</i> | Lysine demethylase 5C |       | 15 | 0 | 171 | 11 |

|   |   |   |       |   |   |   |   |
|---|---|---|-------|---|---|---|---|
| – | – | – | Chr Y | – | – | – | – |
|---|---|---|-------|---|---|---|---|

|     |   |   |   |   |   |   |   |   |   |    |    |    |    |    |    |    |    |    |    |    |    |    |   |   |
|-----|---|---|---|---|---|---|---|---|---|----|----|----|----|----|----|----|----|----|----|----|----|----|---|---|
| Chr | 1 | 2 | 3 | 4 | 5 | 6 | 7 | 8 | 9 | 10 | 11 | 12 | 13 | 14 | 15 | 16 | 17 | 18 | 19 | 20 | 21 | 22 | X | Y |
|-----|---|---|---|---|---|---|---|---|---|----|----|----|----|----|----|----|----|----|----|----|----|----|---|---|

|    |   |   |   |   |   |   |   |   |   |   |   |   |   |   |   |   |   |   |   |   |   |   |   |   |
|----|---|---|---|---|---|---|---|---|---|---|---|---|---|---|---|---|---|---|---|---|---|---|---|---|
| ## | 6 | 2 | 3 | 1 | 3 | 2 | 1 | 1 | 1 | 2 | 3 | 2 | 1 | 1 | 2 | 2 | 1 | – | 2 | 1 | 1 | 4 | 2 | – |
|----|---|---|---|---|---|---|---|---|---|---|---|---|---|---|---|---|---|---|---|---|---|---|---|---|

<sup>1</sup> *Ortholog*: Gene that diverged upon evolutionary separation of species lineages.

*Paralog*: Gene derived from the same ancestor by duplication within the same species.

<sup>2</sup> Negative transcriptional regulator of basic helix-loop-helix (bHLH) transcription factors.





Ursodeoxycholic acid      -      -      -      -      +      -      -      -      -

---

<sup>1</sup> According to the Comparative Toxicogenomics Database, North Carolina State University, Raleigh, NC 27695-7617, USA. Source: <http://ctdbase.org/> (accessed on 20 July 2021, which applies to all footnotes).

<sup>2</sup> Specifics for *PPP1R10*: <http://ctdbase.org/detail.go?type=gene&acc=5514&view=ixn>.

<sup>3</sup> Specifics for *IGFALS*: <http://ctdbase.org/detail.go?type=gene&acc=3483&view=ixn>.

<sup>4</sup> Specifics for *DUSP1*: <http://ctdbase.org/detail.go?type=gene&acc=1843&view=ixn>.
